# Supplementary material for: Sn–N/Sn–O interaction improving electron collection in non-fullerene organic solar cells
Source: Royal Society of Chemistry journal article supplement (doi:10.1039/d0tc00161a), 2020-01-01
Supplement: d0tc00161a1.pdf [file d0tc00161a1.pdf]

## Supplementary Information

# Sn-N/Sn-O Interaction Improving Electron Collection in Non-Fullerene Organic Solar Cells

*Lu Hu<sup>†1</sup>, Nan Zhao<sup>†1,2</sup>, Xueshi Jiang<sup>1</sup>, Youyu Jiang<sup>1</sup>, Fei Qin<sup>1</sup>, Lulu Sun<sup>1</sup>, Wen Wang<sup>1</sup>, and  
Yinhua Zhou<sup>\*1</sup>*

<sup>1</sup>Wuhan National Laboratory for Optoelectronics, Huazhong University of Science and  
Technology, Wuhan 430074, China

<sup>2</sup>China-EU institute for Clean and Renewable Energy, Huazhong University of Science and  
Technology, Wuhan 430074, China

<sup>†</sup>These authors equally contribute to this work.

<sup>\*</sup>Corresponding author. E-mail: [yh\\_zhou@hust.edu.cn](mailto:yh_zhou@hust.edu.cn)

**Figure S1** Influence of PEI/PEO concentrations on the the work functions (a) and conductivities (b) of the interlayers.

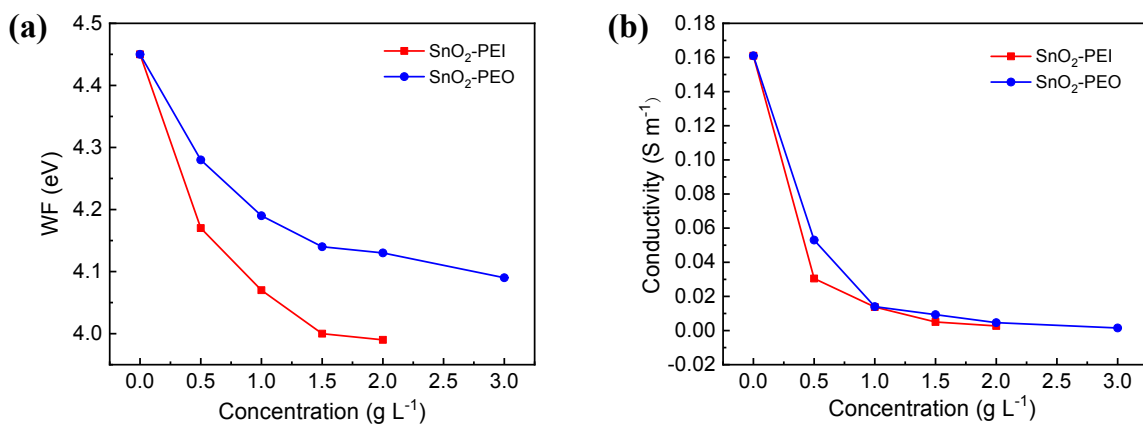

**Figure S2** AFM height profiles of (a) ITO/ZnO; (b) ITO/SnO<sub>2</sub>; (c) ITO/SnO<sub>2</sub>-PEO and (d) ITO/SnO<sub>2</sub>-PEI films.

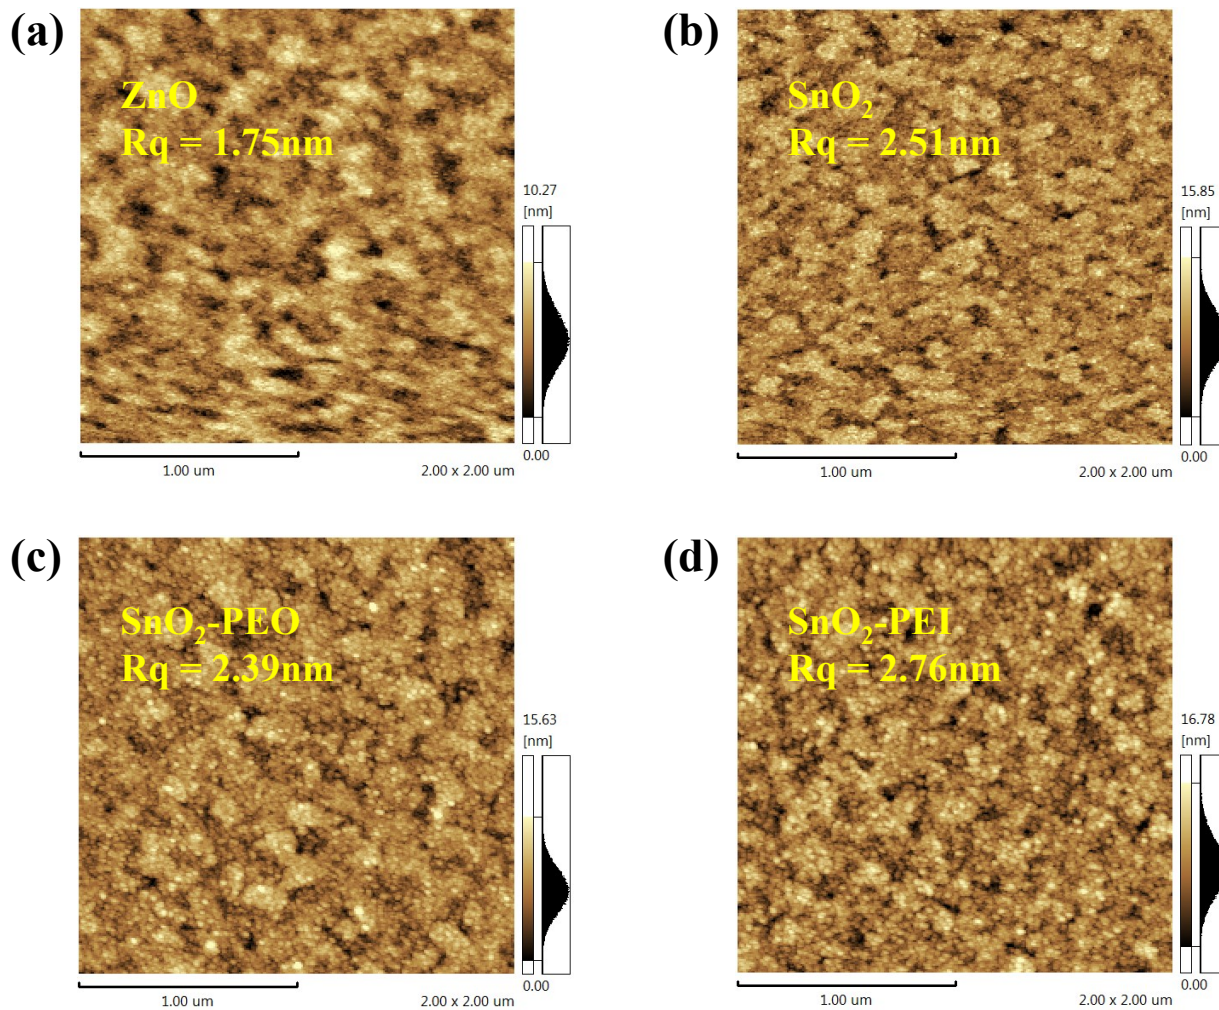

**Figure S3** Resistance of (a) ZnO; (b) SnO<sub>2</sub>; (c) SnO<sub>2</sub>-PEO and (d) SnO<sub>2</sub>-PEI films deposited on glass substrate.

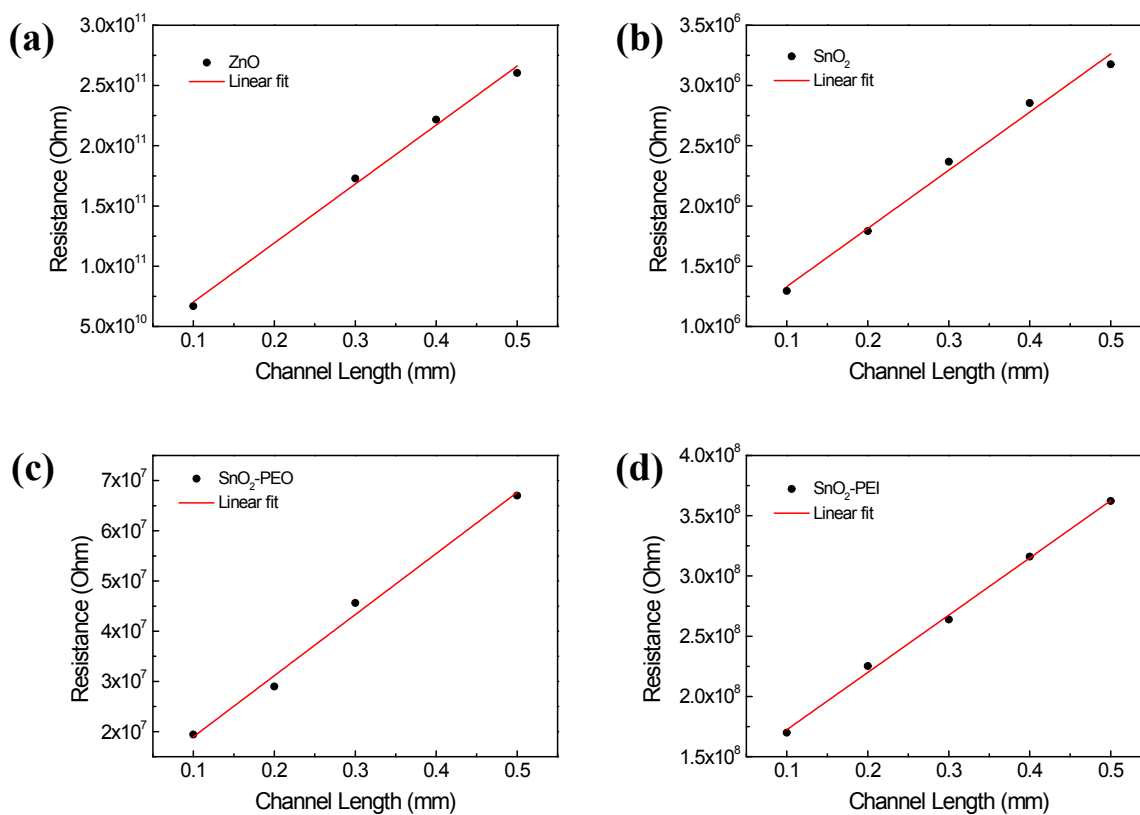

**Figure S4** XPS O 1s core level spectra of (a) SnO<sub>2</sub> and (b) SnO<sub>2</sub>-PEI films.

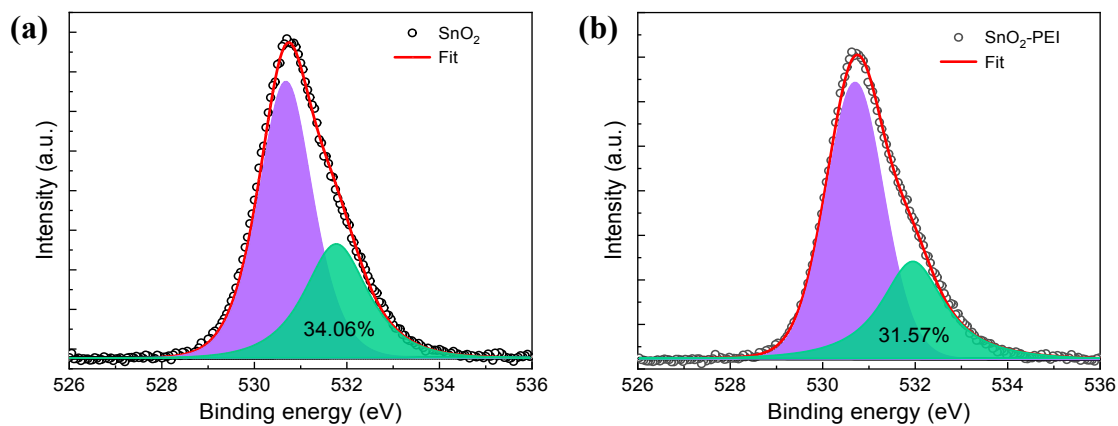

**Figure S5** FTIR transmittance spectra of SnO<sub>2</sub>; PEI and SnO<sub>2</sub>-PEI.

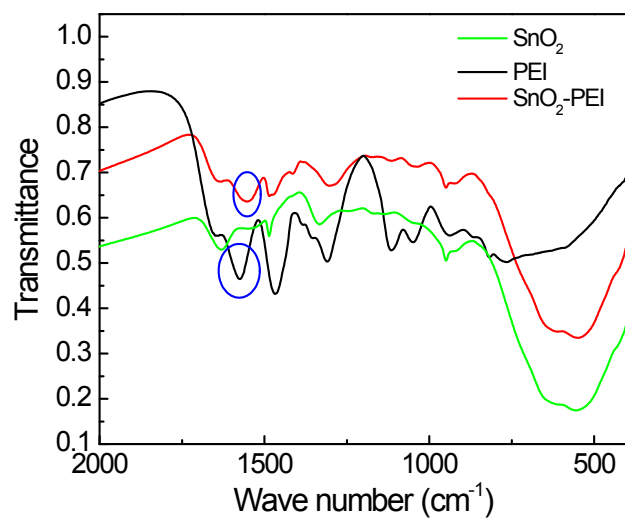

**Figure S6**  $J$ - $V$  characteristics of PM6:IT-4F organic solar cells with different ETLs. The device structure is: glass/ITO/ETL/active layer/MoO<sub>3</sub>/Ag.

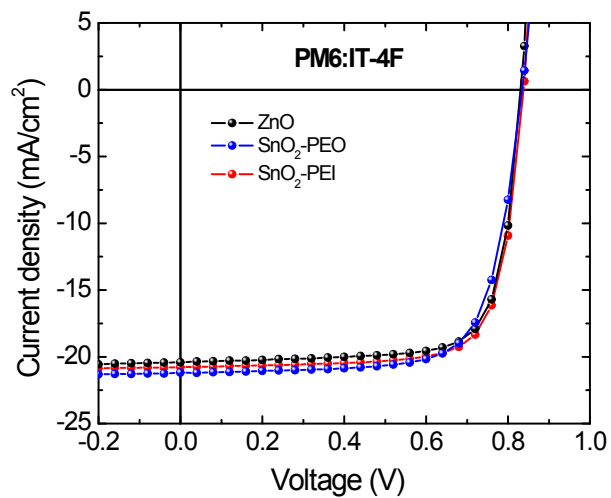

**Figure S7** (a)  $J$ - $V$  characteristics of organic solar cells with PEI or PEO modified ZnO as ETLs.

The device structure is: glass/ITO/ETL/active layer/MoO<sub>3</sub>/Ag. (b) The photo-stability of devices

based on PEI or PEO modified ZnO under continuous AM1.5 illumination (provided by solar simulator) in a nitrogen-filled glove box.

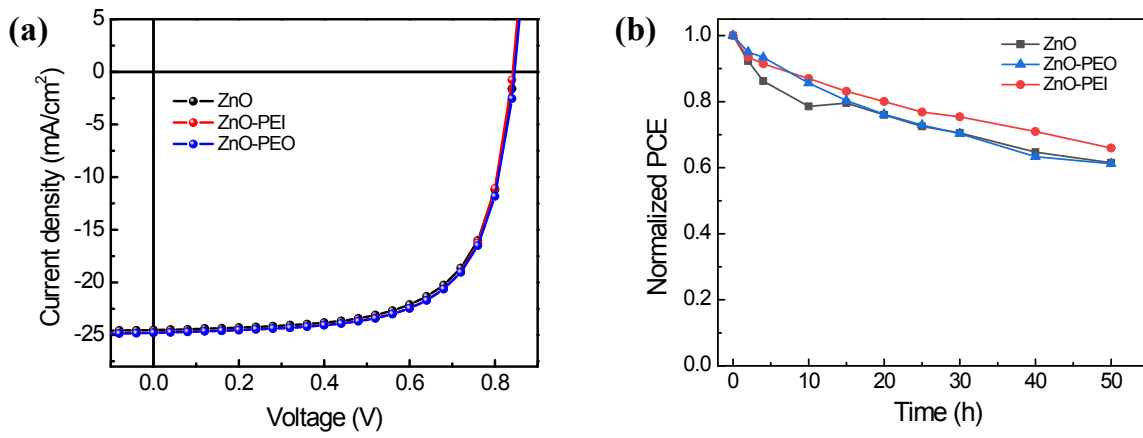

**Table S1** Conductivity values of ETLs (Lateral conductivity extracted from the plots in the **figure S3**).

| ETL                                           | ZnO                   | SnO <sub>2</sub> | SnO <sub>2</sub> -PEO | SnO <sub>2</sub> -PEI |
|-----------------------------------------------|-----------------------|------------------|-----------------------|-----------------------|
| Lateral conductivity<br>(S m <sup>-1</sup> )  | 2.24x10 <sup>-6</sup> | 0.123            | 0.011                 | 1.75x10 <sup>-3</sup> |
| Vertical conductivity<br>(S m <sup>-1</sup> ) | 2.30x10 <sup>-5</sup> | 0.101            | 0.050                 | 0.015                 |

**Table S2** Data statistics of PM6:Y6:IDIC solar cell based on different ETLs (Data extracted from the plots in the above **figure S7a**). The device structure is: glass/ITO/ETL/active layer/MoO<sub>3</sub>/Ag.

| ETL     | $V_{OC}$ (V) | $J_{SC}$<br>(mA cm <sup>-2</sup> ) | FF   | PCE (%) |
|---------|--------------|------------------------------------|------|---------|
| ZnO     | 0.84         | 24.5                               | 0.67 | 13.8    |
| ZnO-PEO | 0.85         | 24.8                               | 0.67 | 14.0    |
| ZnO-PEI | 0.84         | 24.8                               | 0.67 | 14.0    |



**Table S3** The original  $V_{OC}$  data of the devices with different ETLs in photo-stability measurement.

| Time (h) | $V_{OC}(\text{ZnO})$<br>(V) | $V_{OC}(\text{SnO}_2\text{-PEO})$<br>(V) | $V_{OC}(\text{SnO}_2\text{-PEI})$<br>(V) |
|----------|-----------------------------|------------------------------------------|------------------------------------------|
| 0        | 0.85                        | 0.85                                     | 0.84                                     |
| 1        | 0.83                        | 0.84                                     | 0.84                                     |
| 2        | 0.84                        | 0.84                                     | 0.84                                     |
| 4        | 0.82                        | 0.84                                     | 0.83                                     |
| 6        | 0.82                        | 0.83                                     | 0.83                                     |
| 8        | 0.81                        | 0.83                                     | 0.83                                     |
| 10       | 0.81                        | 0.83                                     | 0.83                                     |
| 12       | 0.81                        | 0.83                                     | 0.83                                     |
| 14       | 0.80                        | 0.82                                     | 0.82                                     |
| 16       | 0.80                        | 0.83                                     | 0.83                                     |
| 27       | 0.77                        | 0.81                                     | 0.82                                     |
| 37       | 0.77                        | 0.81                                     | 0.81                                     |
| 50       | 0.74                        | 0.80                                     | 0.81                                     |

**Table S4** The original  $J_{SC}$  data of the devices with different ETLs in photo-stability measurement.

| Time (h) | $J_{SC}(\text{ZnO})$<br>(mA cm <sup>-2</sup> ) | $J_{SC}(\text{SnO}_2\text{-PEO})$<br>(mA cm <sup>-2</sup> ) | $J_{SC}(\text{SnO}_2\text{-PEI})$<br>(mA cm <sup>-2</sup> ) |
|----------|------------------------------------------------|-------------------------------------------------------------|-------------------------------------------------------------|
| 0        | 25.14                                          | 25.78                                                       | 26.00                                                       |
| 1        | 23.78                                          | 25.55                                                       | 25.31                                                       |
| 2        | 22.50                                          | 25.74                                                       | 24.91                                                       |
| 4        | 18.66                                          | 25.44                                                       | 23.49                                                       |
| 6        | 16.37                                          | 25.31                                                       | 22.60                                                       |
| 8        | 15.24                                          | 25.17                                                       | 21.76                                                       |
| 10       | 14.93                                          | 25.77                                                       | 21.68                                                       |
| 12       | 14.36                                          | 25.91                                                       | 21.52                                                       |
| 14       | 13.40                                          | 25.92                                                       | 21.02                                                       |
| 16       | 12.84                                          | 25.63                                                       | 20.33                                                       |
| 27       | 11.77                                          | 25.32                                                       | 18.75                                                       |
| 37       | 11.57                                          | 24.68                                                       | 17.10                                                       |
| 50       | 11.27                                          | 24.80                                                       | 17.82                                                       |

**Table S5** The original FF data of the devices with different ETLs in photo-stability measurement.

| Time (h) | FF(ZnO) | FF(SnO <sub>2</sub> -PEO) | FF(SnO <sub>2</sub> -PEI) |
|----------|---------|---------------------------|---------------------------|
| 0        | 0.72    | 0.72                      | 0.72                      |
| 1        | 0.70    | 0.70                      | 0.68                      |
| 2        | 0.68    | 0.69                      | 0.68                      |
| 4        | 0.65    | 0.68                      | 0.68                      |
| 6        | 0.63    | 0.67                      | 0.67                      |
| 8        | 0.62    | 0.67                      | 0.66                      |
| 10       | 0.62    | 0.66                      | 0.65                      |
| 12       | 0.61    | 0.65                      | 0.65                      |
| 14       | 0.61    | 0.65                      | 0.65                      |
| 16       | 0.60    | 0.64                      | 0.64                      |
| 27       | 0.58    | 0.62                      | 0.61                      |
| 37       | 0.57    | 0.61                      | 0.59                      |
| 50       | 0.55    | 0.58                      | 0.57                      |

**Table S6** The original PCE data of the devices with different ETLs in photo-stability measurement.

| Time (h) | PCE(ZnO)<br>(%) | PCE(SnO <sub>2</sub> -<br>PEO)<br>(%) | PCE(SnO <sub>2</sub> -<br>PEI)<br>(%) |
|----------|-----------------|---------------------------------------|---------------------------------------|
| 0        | 15.25           | 15.75                                 | 15.80                                 |
| 1        | 13.95           | 14.94                                 | 14.41                                 |
| 2        | 12.71           | 14.86                                 | 14.19                                 |
| 4        | 9.99            | 14.45                                 | 13.22                                 |
| 6        | 8.47            | 14.14                                 | 12.59                                 |
| 8        | 7.73            | 13.86                                 | 11.93                                 |
| 10       | 7.51            | 14.04                                 | 11.69                                 |
| 12       | 7.10            | 13.98                                 | 11.51                                 |
| 14       | 6.57            | 13.88                                 | 11.18                                 |
| 16       | 6.17            | 13.64                                 | 10.72                                 |
| 27       | 5.26            | 12.75                                 | 9.33                                  |
| 37       | 5.01            | 12.14                                 | 8.23                                  |
| 50       | 4.61            | 11.61                                 | 8.19                                  |
